# Supplementary material for: Evaluating a tool to improve engagement and recruitment of under-served groups in trials
Source: Springer Nature journal article supplement (doi:10.1186/s13063-022-06747-2), 2022-10-09
Supplement: MOESM1 [file 23585552]

# Study Aspect 1

Survey and selection of candidates

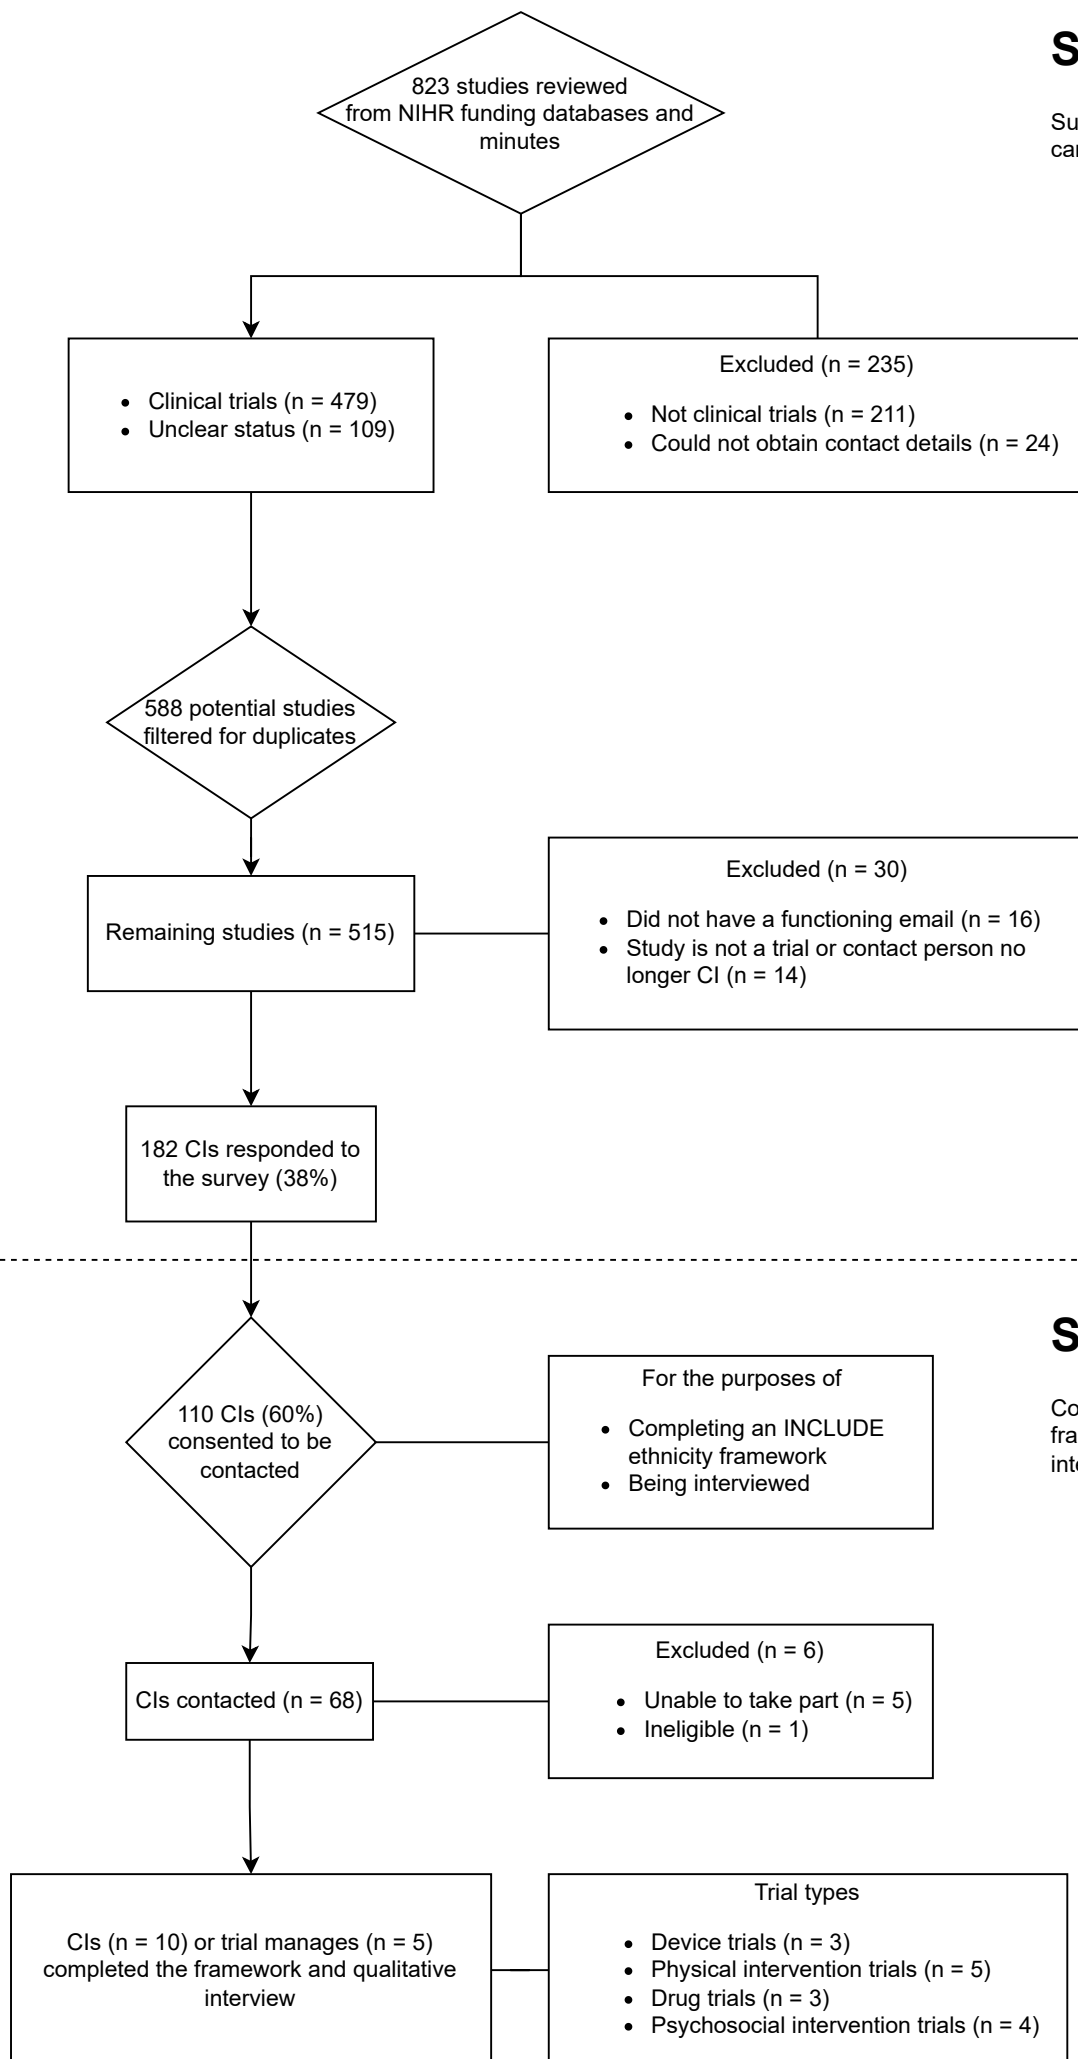

# Study Aspect 2

Completion of INCLUDE ethnicity framework and qualitative interviews
